# Supplementary material for: A new salicylaldehyde-based azo dye and its two lanthanide(iii) complexes displaying slow magnetic relaxation
Source: Royal Society of Chemistry journal article supplement (doi:10.1039/c8dt02951b), 2018-01-01
Supplement: c8dt02951b1.pdf [file c8dt02951b1.pdf]

## Supporting Information

### A new salicylaldehyde-based azo dye and its two lanthanide(III) complexes displaying slow magnetic relaxation

Jian-Qiang He,<sup>a</sup> Shang-Fang Xie,<sup>a</sup> Bi-Lin Lai,<sup>a</sup> Meng Yang,<sup>a</sup> Wen-Bin Chen,<sup>\*a</sup> Yi-Quan Zhang<sup>\*b</sup> and Wen Dong<sup>\*a</sup>

a. Guangzhou Key Laboratory for Environmentally Functional Materials and Technology, School of Chemistry and Chemical Engineering, Guangzhou University, Guangzhou 510006, P. R. China. E-mail: 772694131@qq.com; dw320@aliyun.com.

b. Jiangsu Key Laboratory for NSLSCS, School of Physical Science and Technology, Nanjing Normal University, Nanjing 210023, P. R. China. E-mail: zhangyiquan@nynu.edu.cn.

Table S1 SHAPE analysis for **1** and **2**.

| Complex  | Ln  | SAPR-8       | TDD-8 | JBTPR-8 | BTPR-8 |
|----------|-----|--------------|-------|---------|--------|
| <b>1</b> | Dy1 | <b>0.513</b> | 1.822 | 1.871   | 1.623  |
|          | Dy2 | <b>0.679</b> | 1.244 | 1.927   | 1.552  |
| <b>2</b> | Tb1 | <b>0.516</b> | 1.702 | 1.923   | 1.673  |
|          | Tb2 | <b>0.693</b> | 1.252 | 1.963   | 1.677  |

SAPR-8 = square antiprism; TDD-8 = triangular dodecahedron; JBTPR-8 = Biaugmented trigonal prism J50; BTPR-8 = Biaugmented trigonal prism; JSD-8 = Snub diphenoid J84.

Table S2. The bond lengths [ $\text{\AA}$ ] and angles [ $^\circ$ ] for complex **1** and **2**.

|             |          |             |          |
|-------------|----------|-------------|----------|
| Dy(1)-O(1)  | 2.373(5) | Tb(1)-O(1)  | 2.384(8) |
| Dy(1)-O(2)  | 2.350(5) | Tb(1)-O(2)  | 2.351(8) |
| Dy(1)-O(3)  | 2.400(5) | Tb(1)-O(3)  | 2.415(8) |
| Dy(1)-O(4)  | 2.301(5) | Tb(1)-O(4)  | 2.313(8) |
| Dy(1)-O(6)  | 2.453(6) | Tb(1)-O(6)  | 2.472(7) |
| Dy(1)-O(7)  | 2.283(5) | Tb(1)-O(7)  | 2.287(7) |
| Dy(1)-O(9)  | 2.388(5) | Tb(1)-O(9)  | 2.386(7) |
| Dy(1)-O(10) | 2.284(5) | Tb(1)-O(10) | 2.290(8) |
| Dy(2)-O(12) | 2.342(5) | Tb(2)-O(12) | 2.349(8) |
| Dy(2)-O(13) | 2.475(5) | Tb(2)-O(13) | 2.481(8) |

|                   |            |                   |          |
|-------------------|------------|-------------------|----------|
| Dy(2)-O(14)       | 2.256(5)   | Tb(2)-O(14)       | 2.278(8) |
| Dy(2)-O(16)       | 2.392(5)   | Tb(2)-O(16)       | 2.406(8) |
| Dy(2)-O(17)       | 2.395(6)   | Tb(2)-O(17)       | 2.418(8) |
| Dy(2)-O(18)       | 2.298(5)   | Tb(2)-O(18)       | 2.315(8) |
| Dy(2)-O(20)       | 2.383(5)   | Tb(2)-O(20)       | 2.394(8) |
| Dy(2)-O(21)       | 2.325(5)   | Tb(2)-O(21)       | 2.333(7) |
| O(1)-Dy(1)-O(3)   | 72.79(19)  | O(1)-Tb(1)-O(3)   | 72.6(3)  |
| O(1)-Dy(1)-O(6)   | 121.42(19) | O(1)-Tb(1)-O(6)   | 121.9(3) |
| O(1)-Dy(1)-O(9)   | 75.31(18)  | O(1)-Tb(1)-O(9)   | 75.4(3)  |
| O(2)-Dy(1)-O(1)   | 70.18(18)  | O(2)-Tb(1)-O(1)   | 70.4(3)  |
| O(2)-Dy(1)-O(3)   | 86.41(19)  | O(2)-Tb(1)-O(3)   | 85.9(3)  |
| O(2)-Dy(1)-O(6)   | 73.39(18)  | O(2)-Tb(1)-O(6)   | 74.1(3)  |
| O(2)-Dy(1)-O(9)   | 143.50(18) | O(2)-Tb(1)-O(9)   | 143.7(3) |
| O(3)-Dy(1)-O(6)   | 147.10(17) | O(3)-Tb(1)-O(6)   | 147.2(2) |
| O(4)-Dy(1)-O(1)   | 133.21(18) | O(4)-Tb(1)-O(1)   | 132.7(3) |
| O(4)-Dy(1)-O(2)   | 78.00(19)  | O(4)-Tb(1)-O(2)   | 77.4(3)  |
| O(4)-Dy(1)-O(3)   | 71.82(18)  | O(4)-Tb(1)-O(3)   | 71.4(3)  |
| O(4)-Dy(1)-O(6)   | 78.63(18)  | O(4)-Tb(1)-O(6)   | 79.0(3)  |
| O(4)-Dy(1)-O(9)   | 120.18(19) | O(4)-Tb(1)-O(9)   | 120.2(3) |
| O(7)-Dy(1)-O(1)   | 75.06(18)  | O(7)-Tb(1)-O(1)   | 75.8(2)  |
| O(7)-Dy(1)-O(2)   | 104.71(19) | O(7)-Tb(1)-O(2)   | 105.5(3) |
| O(7)-Dy(1)-O(3)   | 139.80(18) | O(7)-Tb(1)-O(3)   | 140.2(2) |
| O(7)-Dy(1)-O(4)   | 147.86(18) | O(7)-Tb(1)-O(4)   | 147.8(3) |
| O(7)-Dy(1)-O(6)   | 71.84(17)  | O(7)-Tb(1)-O(6)   | 71.4(2)  |
| O(7)-Dy(1)-O(9)   | 76.88(18)  | O(7)-Tb(1)-O(9)   | 76.8(3)  |
| O(7)-Dy(1)-O(10)  | 80.47(18)  | O(7)-Tb(1)-O(10)  | 80.2(3)  |
| O(9)-Dy(1)-O(3)   | 72.15(18)  | O(9)-Tb(1)-O(3)   | 72.5(3)  |
| O(9)-Dy(1)-O(6)   | 137.62(17) | O(9)-Tb(1)-O(6)   | 137.0(2) |
| O(10)-Dy(1)-O(1)  | 143.38(18) | O(10)-Tb(1)-O(1)  | 143.5(3) |
| O(10)-Dy(1)-O(2)  | 143.62(18) | O(10)-Tb(1)-O(2)  | 143.7(3) |
| O(10)-Dy(1)-O(3)  | 113.13(19) | O(10)-Tb(1)-O(3)  | 112.9(3) |
| O(10)-Dy(1)-O(4)  | 79.61(18)  | O(10)-Tb(1)-O(4)  | 79.8(3)  |
| O(10)-Dy(1)-O(6)  | 74.34(18)  | O(10)-Tb(1)-O(6)  | 74.1(3)  |
| O(10)-Dy(1)-O(9)  | 72.87(18)  | O(10)-Tb(1)-O(9)  | 72.6(3)  |
| O(12)-Dy(2)-O(13) | 73.88(18)  | O(12)-Tb(2)-O(13) | 74.6(2)  |
| O(12)-Dy(2)-O(16) | 73.37(18)  | O(12)-Tb(2)-O(16) | 73.7(3)  |
| O(12)-Dy(2)-O(17) | 83.91(18)  | O(12)-Tb(2)-O(17) | 84.2(3)  |
| O(12)-Dy(2)-O(20) | 145.01(19) | O(12)-Tb(2)-O(20) | 145.0(2) |
| O(14)-Dy(2)-O(12) | 106.24(19) | O(14)-Tb(2)-O(12) | 106.5(3) |
| O(14)-Dy(2)-O(13) | 70.89(18)  | O(14)-Tb(2)-O(13) | 70.1(2)  |
| O(14)-Dy(2)-O(16) | 72.37(18)  | O(14)-Tb(2)-O(16) | 72.2(2)  |
| O(14)-Dy(2)-O(17) | 138.83(18) | O(14)-Tb(2)-O(17) | 139.1(3) |
| O(14)-Dy(2)-O(18) | 147.40(19) | O(14)-Tb(2)-O(18) | 147.4(3) |

|                   |            |                   |          |
|-------------------|------------|-------------------|----------|
| O(14)-Dy(2)-O(20) | 78.88(19)  | O(14)-Tb(2)-O(20) | 78.5(3)  |
| O(14)-Dy(2)-O(21) | 80.01(18)  | O(14)-Tb(2)-O(21) | 79.9(2)  |
| O(16)-Dy(2)-O(13) | 120.27(18) | O(16)-Tb(2)-O(13) | 120.1(3) |
| O(16)-Dy(2)-O(17) | 72.82(19)  | O(16)-Tb(2)-O(17) | 73.5(3)  |
| O(17)-Dy(2)-O(13) | 148.06(16) | O(17)-Tb(2)-O(13) | 148.9(3) |
| O(18)-Dy(2)-O(12) | 79.79(19)  | O(18)-Tb(2)-O(12) | 79.9(3)  |
| O(18)-Dy(2)-O(13) | 80.63(18)  | O(18)-Tb(2)-O(13) | 81.5(3)  |
| O(18)-Dy(2)-O(16) | 138.17(18) | O(18)-Tb(2)-O(16) | 138.5(3) |
| O(18)-Dy(2)-O(17) | 72.95(19)  | O(18)-Tb(2)-O(17) | 72.5(3)  |
| O(18)-Dy(2)-O(20) | 114.85(19) | O(18)-Tb(2)-O(20) | 114.9(3) |
| O(18)-Dy(2)-O(21) | 76.75(18)  | O(18)-Tb(2)-O(21) | 76.6(2)  |
| O(20)-Dy(2)-O(13) | 137.50(17) | O(20)-Tb(2)-O(13) | 136.5(2) |
| O(20)-Dy(2)-O(16) | 75.59(18)  | O(20)-Tb(2)-O(16) | 75.2(3)  |
| O(20)-Dy(2)-O(17) | 71.75(18)  | O(20)-Tb(2)-O(17) | 71.9(3)  |
| O(21)-Dy(2)-O(12) | 142.01(18) | O(21)-Tb(2)-O(12) | 141.9(2) |
| O(21)-Dy(2)-O(13) | 73.14(17)  | O(21)-Tb(2)-O(13) | 72.6(3)  |
| O(21)-Dy(2)-O(16) | 141.23(17) | O(21)-Tb(2)-O(16) | 141.0(2) |
| O(21)-Dy(2)-O(17) | 116.43(18) | O(21)-Tb(2)-O(17) | 116.0(3) |
| O(21)-Dy(2)-O(20) | 72.75(18)  | O(21)-Tb(2)-O(20) | 72.9(2)  |

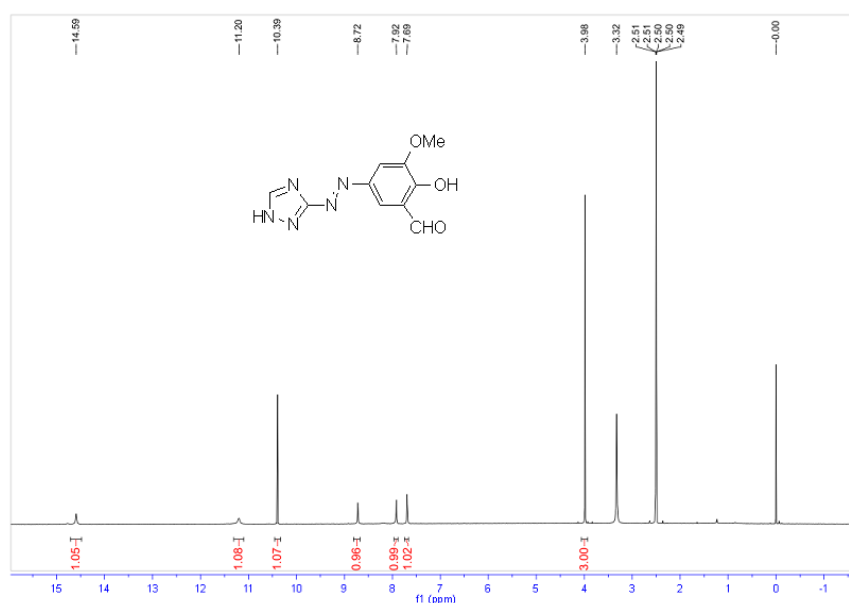

Fig. S1 Schematic illustration for <sup>1</sup>H NMR peaks of H<sub>2</sub>TMSA in DMSO-d<sub>6</sub>.

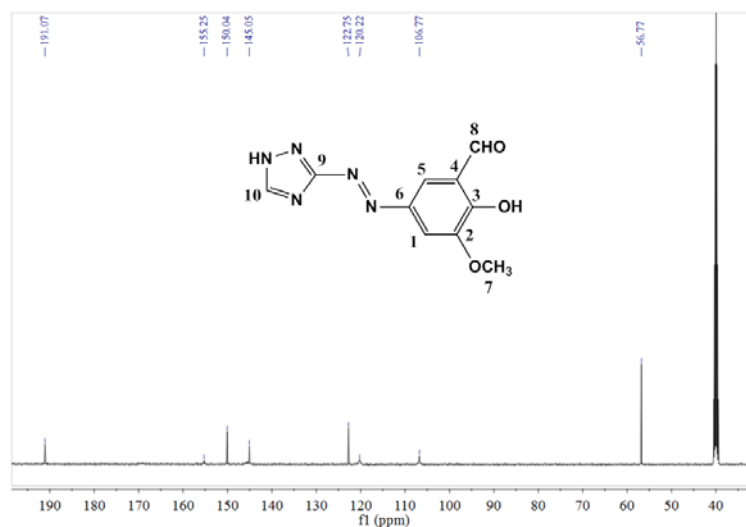

Fig. S2 Schematic illustration for  $^{13}\text{C}$  NMR peaks of  $\text{H}_2\text{TMSA}$  in  $\text{DMSO-d}^6$ .

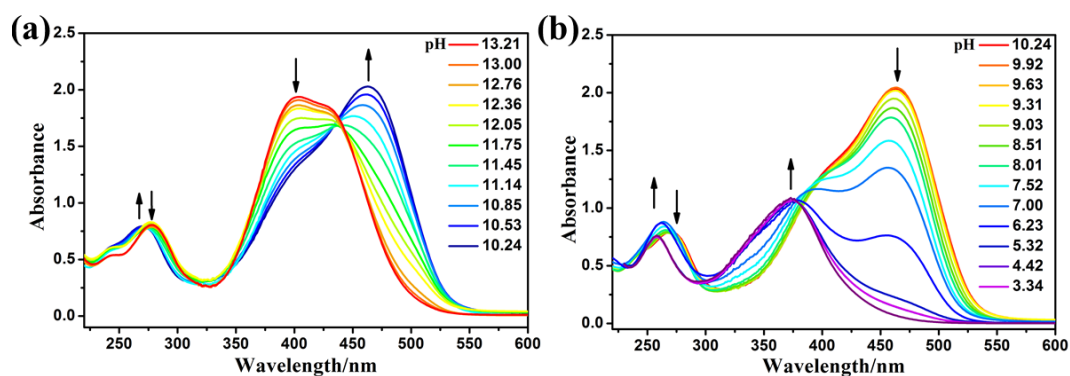

Fig. S3 Absorbance spectra of the TMSA in ethanol, after adjusted the pH value to 13.21, and recovered the pH value by the dilute solution of  $\text{HCl}$  ( $c = 1 \text{ mol L}^{-1}$ ). pH: 13.21-10.24 (a); 10.24-3.34 (b). Arrows indicate changes in UV-vis absorption.

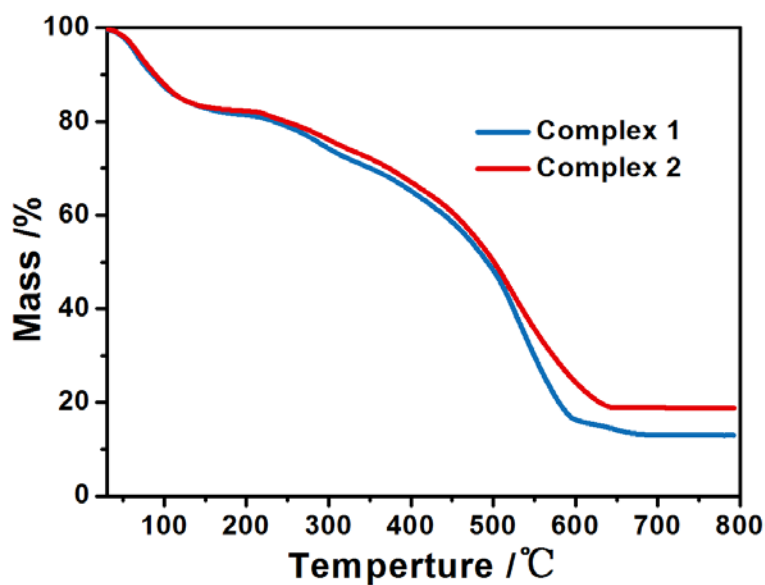

Fig. S4 Thermal gravimetric analyses (TGA) curves for complex 1 and 2.

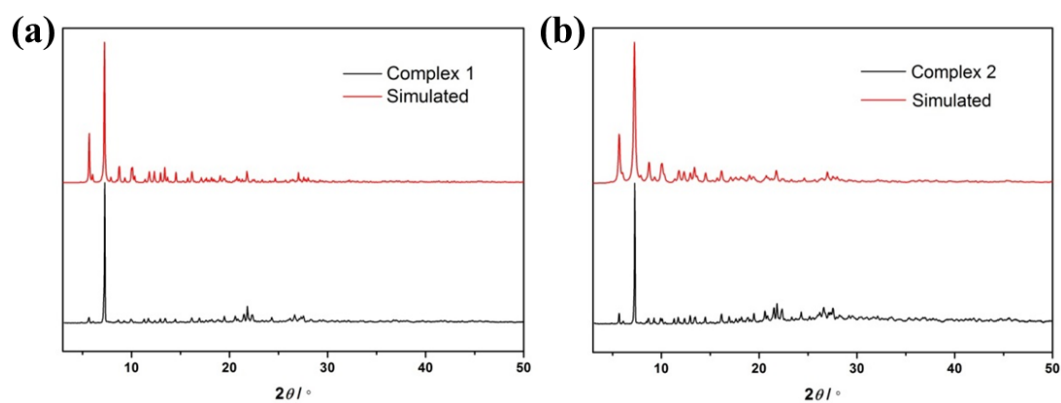

Fig. S5 Powder X-ray diffraction (PXRD) patterns for complexes **1** and **2**.

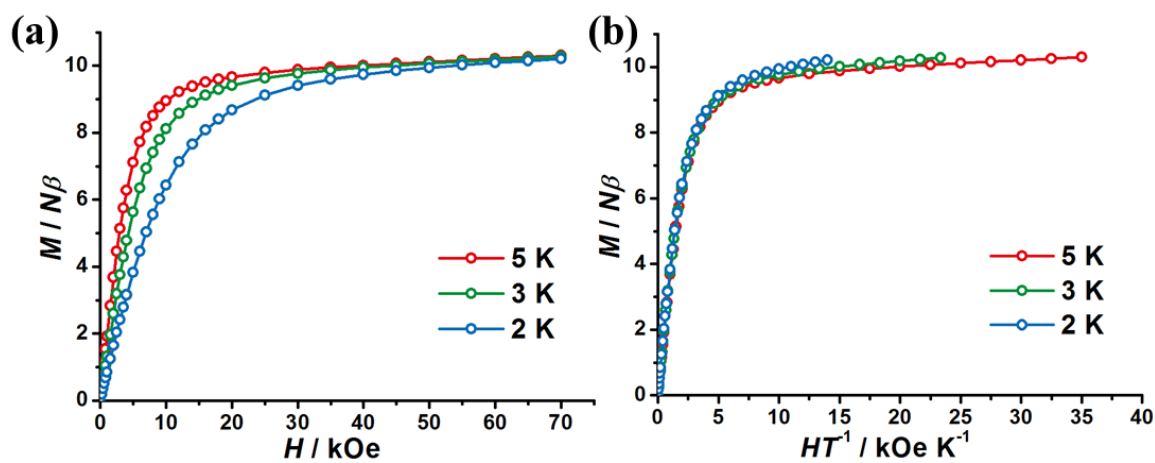

Fig. S6 Plots of  $M-H$  (a) and  $M-HT$  (b) for **1** at 2, 3 and 5 K. The solid lines are guides to the eyes.

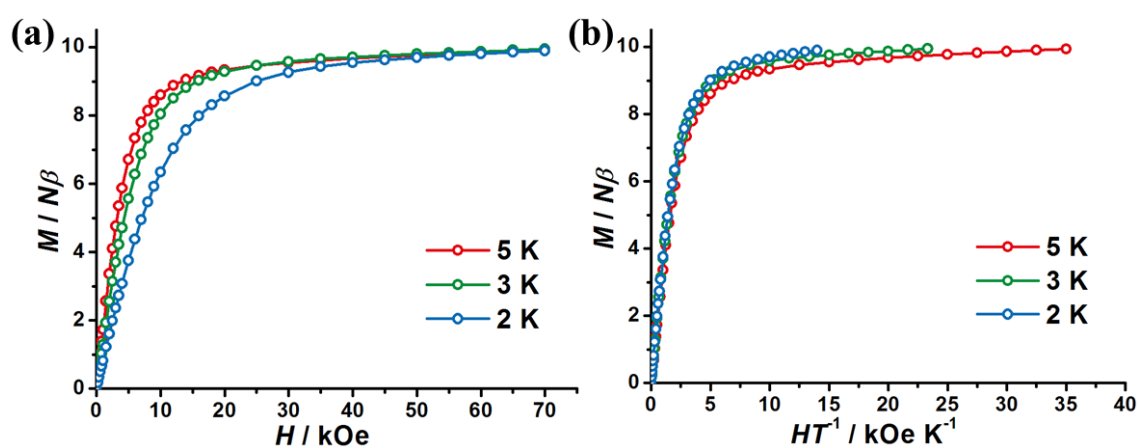

Fig. S7 Plots of  $M-H$  (a) and  $M-HT$  (b) for **2** at 2, 3 and 5 K. The solid lines are guides to the eyes.

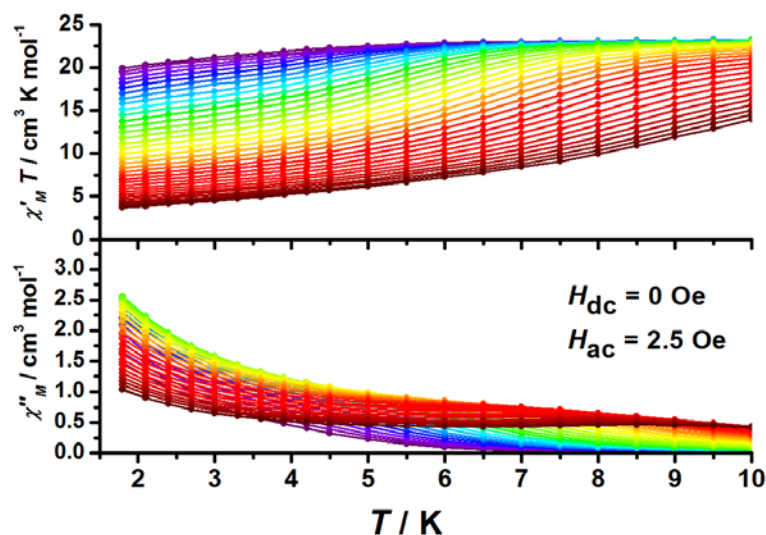

Fig. S8 Temperature dependence of the in-phase ( $\chi_M' T$ ) and out-of-phase ( $\chi_M''$ ) products at a zero field for **1**, with ac frequencies of 1–1000 Hz. The solid lines are guides to the eyes.

Table S3 Relaxation fitting parameters from Least-Squares Fitting of  $\chi(\omega)$  data for **1** at zero dc field.

| $T / K$ | $\tau$   | $\tau$         | $\alpha$ | $\alpha$       | $\chi^0$ | $\chi^0$       | $\chi_\infty$ | $\chi_\infty$  |
|---------|----------|----------------|----------|----------------|----------|----------------|---------------|----------------|
|         | Value    | Standard Error | Value    | Standard Error | Value    | Standard Error | Value         | Standard Error |
| 10      | 4.00E-04 | 1.27E-05       | 0.26429  | 0.00893        | 2.34481  | 0.00377        | 0.98921       | 0.02017        |
| 9.5     | 4.68E-04 | 1.24E-05       | 0.25292  | 0.00818        | 2.46689  | 0.00404        | 0.97029       | 0.01882        |
| 9       | 5.72E-04 | 1.28E-05       | 0.24297  | 0.0076         | 2.6011   | 0.00441        | 0.96512       | 0.01738        |
| 8.5     | 7.15E-04 | 1.50E-05       | 0.23995  | 0.00772        | 2.75504  | 0.00534        | 0.95955       | 0.01769        |
| 8       | 9.17E-04 | 1.93E-05       | 0.24238  | 0.00816        | 2.92856  | 0.00675        | 0.95919       | 0.01877        |
| 7.5     | 0.0012   | 2.57E-05       | 0.25335  | 0.00854        | 3.12831  | 0.00852        | 0.96305       | 0.01989        |
| 7       | 0.0016   | 3.60E-05       | 0.27184  | 0.00902        | 3.3622   | 0.01098        | 0.97197       | 0.02157        |
| 6.5     | 0.00214  | 5.22E-05       | 0.29915  | 0.00963        | 3.6388   | 0.01455        | 0.97578       | 0.0242         |
| 6       | 0.00282  | 7.44E-05       | 0.33352  | 0.00996        | 3.97188  | 0.01911        | 0.96902       | 0.02706        |
| 5.5     | 0.00368  | 1.01E-04       | 0.36975  | 0.00987        | 4.36754  | 0.0244         | 0.94845       | 0.02953        |
| 5       | 0.00479  | 1.29E-04       | 0.40305  | 0.00914        | 4.84987  | 0.02949        | 0.92587       | 0.03039        |
| 4.5     | 0.0062   | 1.60E-04       | 0.42997  | 0.00822        | 5.43547  | 0.0345         | 0.91847       | 0.03029        |
| 4.2     | 0.00714  | 1.79E-04       | 0.44451  | 0.00768        | 5.85134  | 0.03767        | 0.91714       | 0.03029        |
| 3.9     | 0.00805  | 2.02E-04       | 0.45569  | 0.00734        | 6.31367  | 0.04169        | 0.92218       | 0.03108        |
| 3.6     | 0.00902  | 2.28E-04       | 0.46625  | 0.00708        | 6.87481  | 0.04684        | 0.92678       | 0.0325         |
| 3.3     | 0.00993  | 2.54E-04       | 0.47396  | 0.00691        | 7.50593  | 0.05271        | 0.94188       | 0.03443        |
| 3       | 0.01081  | 2.81E-04       | 0.47989  | 0.00678        | 8.2596   | 0.05968        | 0.9662        | 0.03696        |
| 2.7     | 0.01171  | 3.15E-04       | 0.48811  | 0.00673        | 9.18864  | 0.06943        | 0.98497       | 0.04089        |
| 2.4     | 0.01251  | 3.43E-04       | 0.49526  | 0.00661        | 10.34123 | 0.08025        | 1.0136        | 0.04537        |
| 2.1     | 0.01322  | 3.67E-04       | 0.5023   | 0.00646        | 11.75593 | 0.09271        | 1.05092       | 0.05065        |
| 1.8     | 0.01379  | 3.94E-04       | 0.50876  | 0.00643        | 13.54754 | 0.11001        | 1.10895       | 0.05858        |

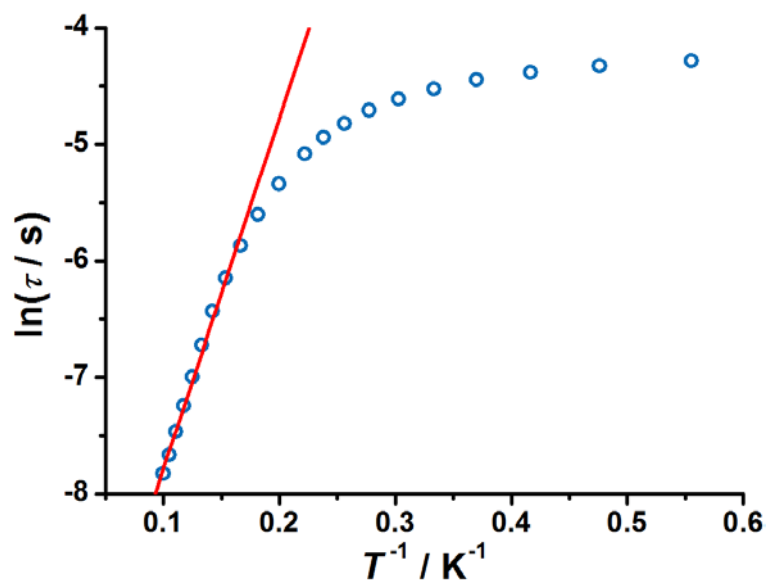

Fig. S9 The plots of  $\ln(\tau)$  vs.  $T^{-1}$  for **1** under zero dc fields. The red line represents fit the data in the high temperature region with an Arrhenius law, resulting in an energy barrier  $U_{\text{eff}} = 20.9(6)$  K, pre-exponential factor  $\tau_0 = 2.0 \times 10^{-6}$  s.

Table S4 Selected Dy complexes with square antiprism geometry.

| Complexes                                                                                                                                     | $U_{\text{eff}} / \text{cm}^{-1} (H_{\text{dc}} / \text{Oe})$               | Ref                                                       |
|-----------------------------------------------------------------------------------------------------------------------------------------------|-----------------------------------------------------------------------------|-----------------------------------------------------------|
| $[\text{Dy}_2(\text{acac})_6(\text{bpe})(\text{MeOH})_2] \cdot \text{bpe} \cdot 2\text{MeOH}$                                                 | $71.7 \text{ cm}^{-1} (1500 \text{ Oe})$                                    | Inorg. Chem. 2017, 56, 8829–8836. <sup>1</sup>            |
| $[\text{Dy}(\text{acac})_3(\text{bpe})]_n$                                                                                                    | $33.7 \text{ cm}^{-1} (800 \text{ Oe})$                                     | Dalton Trans., 2016, 45, 8149–8153. <sup>2</sup>          |
| $[(\text{dtc})_3\text{Dy}(\text{phen})]$                                                                                                      | $13.9 \text{ cm}^{-1} (400 \text{ Oe})$                                     |                                                           |
| $[(\text{dbm})_2\text{Dy}(\text{dtc})(\text{phen})]$                                                                                          | $27.8 \text{ cm}^{-1} (0 \text{ Oe})/31.2 \text{ cm}^{-1}(1000 \text{ Oe})$ |                                                           |
| $[\text{Dy}(\text{acac})_3(\text{H}_2\text{O})_2]$                                                                                            | $45.9 \text{ cm}^{-1} (0 \text{ Oe})$                                       | Angew. Chem. Int. Ed. 2010, 49, 7448 – 7451. <sup>3</sup> |
| $[\text{hqH}_2][\text{Dy}_2(\text{hq})_4(\text{NO}_3)_3] \cdot \text{MeOH}$                                                                   | $40.9 \text{ cm}^{-1} (1000 \text{ Oe})$                                    | Nat. Commun., 2014, 5, 5243. <sup>4</sup>                 |
| $[\text{TBA}][\text{Pc}_2\text{Dy}]$                                                                                                          | $27.8 \text{ cm}^{-1} (0 \text{ Oe})$                                       | J. Am. Chem. Soc., 2003, 125, 8694-8695. <sup>5</sup>     |
| $[\text{Dy}(\text{HATSA})(\text{OAc})(\text{H}_2\text{O})_2] \cdot 4\text{H}_2\text{O}$                                                       | $2.4 \text{ cm}^{-1} (0 \text{ Oe})/25.5 \text{ cm}^{-1}(1000 \text{ Oe})$  | Inorg. Chim. Acta, 2018, 469, 38-43. <sup>6</sup>         |
| $\{[\text{Dy}(\text{HTMSA})_3(\text{H}_2\text{O})_2][\text{Dy}(\text{HTMSA})_3(\text{DMF})(\text{H}_2\text{O})]\} \cdot 15\text{H}_2\text{O}$ | $20.9 \text{ cm}^{-1} (0 \text{ Oe})$                                       | <b>This work</b>                                          |

acac=acetylacetonate; bpe= 1,2-bis(4-pyridyl)ethylene; dtc = diethyldithiocarbamate; dbm= dibenzoylmethanoate; phen= phenanthroline; hq= 8-hydroxy quinoline; Pc= phthalocyanine; TBA =N(C<sub>4</sub>H<sub>9</sub>)<sub>4</sub>. H<sub>3</sub>ATSA = 5-azotriazolyl salicylic acid.

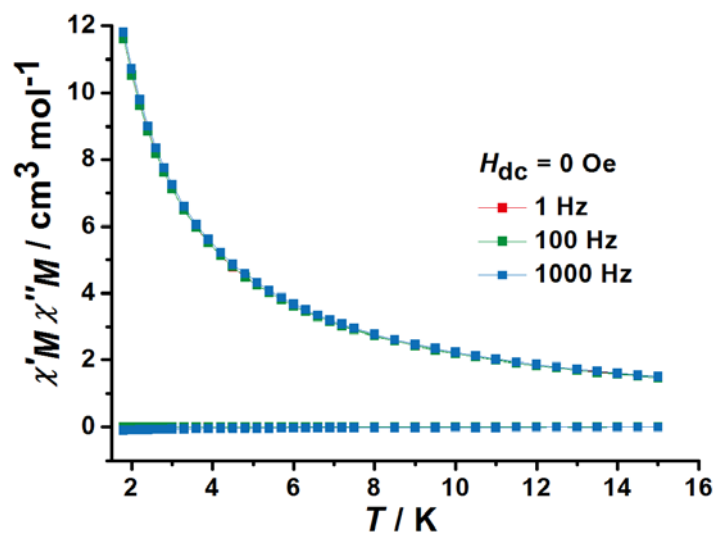

Fig. S10 Temperature dependence of the in-phase ( $\chi'_M$ ) and out-of-phase ( $\chi''_M$ ) products at zero dc field for **2**.

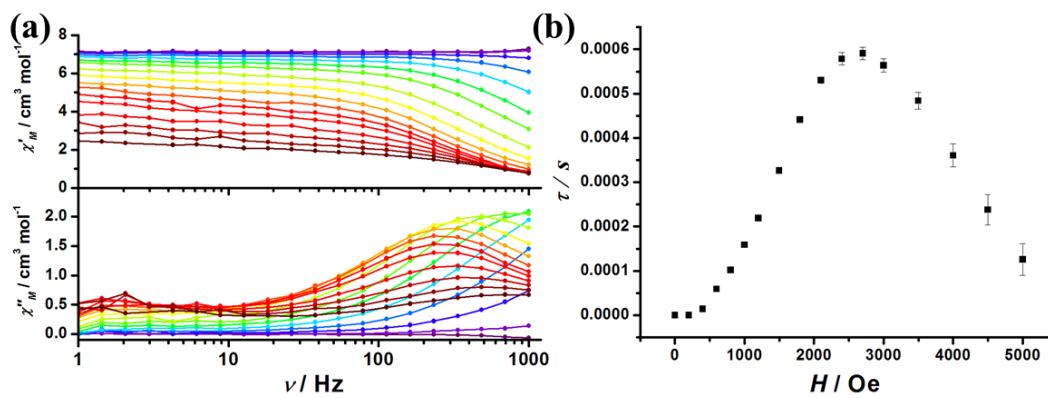

Fig. S11 (a) Frequency dependence of  $\chi'_M$  and  $\chi''_M$  signals at various fields at 3 K for **2**. The solid lines are guides to the eyes. (b) Field dependence of the magnetic relaxation time ( $\tau$ ).



Table S5 Relaxation fitting parameters from Least-Squares Fitting of  $\chi(\omega)$  data for **2** at various dc field at 3 K.

| H / Oe | $\tau$   | $\tau$         | $\alpha$ | $\alpha$       | $\chi_0$ | $\chi_0$       | $\chi_\infty$ | $\chi_\infty$  |
|--------|----------|----------------|----------|----------------|----------|----------------|---------------|----------------|
|        | Value    | Standard Error | Value    | Standard Error | Value    | Standard Error | Value         | Standard Error |
| 0      | 2.13E-04 | 1.63E-05       | -0.53026 | 0.10216        | 7.14695  | 0.00533        | 7.21519       | 0.01452        |
| 200    | 7.93E-08 | 1.29E-04       | -0.21448 | 0.09941        | 7.10403  | 0.00533        | -1707.17      | 3.38E+06       |
| 400    | 1.42E-05 | 3.50E-06       | 0.11251  | 0.01233        | 7.03171  | 0.00331        | 0.16157       | 1.27277        |
| 600    | 5.90E-05 | 2.61E-06       | 0.10713  | 0.00664        | 6.90858  | 0.00404        | 2.24768       | 0.13773        |
| 800    | 1.02E-04 | 2.75E-06       | 0.12759  | 0.00591        | 6.75023  | 0.00606        | 1.71236       | 0.08556        |
| 1000   | 1.59E-04 | 3.13E-06       | 0.14982  | 0.00563        | 6.56926  | 0.00829        | 1.29197       | 0.06305        |
| 1200   | 2.19E-04 | 3.44E-06       | 0.17515  | 0.0052         | 6.36851  | 0.00984        | 0.87024       | 0.05024        |
| 1500   | 3.26E-04 | 4.44E-06       | 0.19401  | 0.0054         | 6.01044  | 0.01288        | 0.50013       | 0.04251        |
| 1800   | 4.41E-04 | 5.24E-06       | 0.20267  | 0.00536        | 5.63548  | 0.01435        | 0.3324        | 0.03503        |
| 2100   | 5.31E-04 | 6.68E-06       | 0.20748  | 0.00607        | 5.22548  | 0.01681        | 0.22011       | 0.03441        |
| 2400   | 5.79E-04 | 1.41E-05       | 0.2127   | 0.01201        | 4.79346  | 0.0324         | 0.12574       | 0.06121        |
| 2700   | 5.91E-04 | 1.43E-05       | 0.21946  | 0.01191        | 4.38855  | 0.03021        | 0.05728       | 0.05604        |
| 3000   | 5.64E-04 | 1.51E-05       | 0.2488   | 0.01222        | 4.05476  | 0.02925        | -0.04339      | 0.0568         |
| 3500   | 4.84E-04 | 1.91E-05       | 0.28979  | 0.01547        | 3.51625  | 0.03199        | -0.16205      | 0.07162        |
| 4000   | 3.61E-04 | 2.62E-05       | 0.35806  | 0.02096        | 3.0725   | 0.03818        | -0.37637      | 0.11052        |
| 4500   | 2.38E-04 | 3.45E-05       | 0.42758  | 0.028          | 2.68458  | 0.04521        | -0.62558      | 0.18182        |
| 5000   | 1.26E-04 | 3.57E-05       | 0.49986  | 0.03312        | 2.36578  | 0.04852        | -0.98853      | 0.30281        |

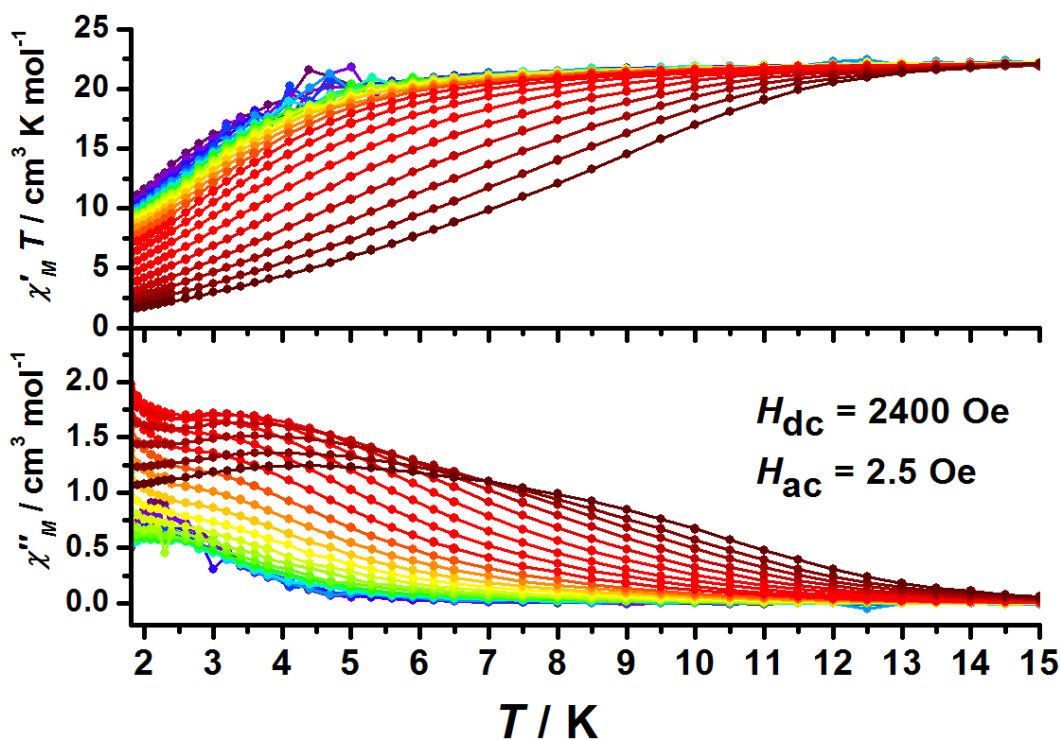

Fig. S12 Temperature dependence of the in-phase ( $\chi_M'T$ ) and out-of-phase ( $\chi_M''$ ) products at 2400 Oe field for **2**, with ac frequencies of 1–1000 Hz. The solid lines are guides to the eyes.

Table S6 Relaxation fitting parameters from Least-Squares Fitting of  $\chi(\omega)$  data for 2 at 2400 Oe field.

| $T / K$ | $\tau$   | $\tau$         | $\alpha$ | $\alpha$       | $\chi^0$ | $\chi^0$       | $\chi_\infty$ | $\chi_\infty$  |
|---------|----------|----------------|----------|----------------|----------|----------------|---------------|----------------|
|         | Value    | Standard Error | Value    | Standard Error | Value    | Standard Error | Value         | Standard Error |
| 1.8     | 8.42E-04 | 1.05E-05       | 0.18035  | 0.00684        | 5.4445   | 0.02224        | 0.24171       | 0.03362        |
| 1.9     | 7.87E-04 | 1.16E-05       | 0.19663  | 0.00778        | 5.26115  | 0.02408        | 0.19976       | 0.0387         |
| 2       | 7.42E-04 | 1.43E-05       | 0.20253  | 0.00993        | 5.12059  | 0.02938        | 0.17704       | 0.04972        |
| 2.15    | 7.14E-04 | 1.52E-05       | 0.21313  | 0.01067        | 5.06692  | 0.03109        | 0.14284       | 0.05453        |
| 2.3     | 6.73E-04 | 1.49E-05       | 0.21695  | 0.01079        | 4.96634  | 0.03013        | 0.1335        | 0.0557         |
| 2.4     | 6.53E-04 | 1.57E-05       | 0.22979  | 0.01133        | 4.95723  | 0.0317         | 0.08745       | 0.06032        |
| 2.6     | 6.30E-04 | 1.38E-05       | 0.23137  | 0.01021        | 4.94579  | 0.0281         | 0.08173       | 0.05524        |
| 2.8     | 6.07E-04 | 1.25E-05       | 0.22278  | 0.0096         | 4.92403  | 0.02565        | 0.0985        | 0.05203        |
| 3       | 5.85E-04 | 1.57E-05       | 0.21492  | 0.01259        | 4.89437  | 0.03264        | 0.1113        | 0.06841        |
| 3.2     | 5.70E-04 | 8.54E-06       | 0.20053  | 0.00715        | 4.85628  | 0.01783        | 0.16408       | 0.03816        |
| 3.4     | 5.47E-04 | 7.51E-06       | 0.18983  | 0.0066         | 4.7895   | 0.01575        | 0.19145       | 0.03491        |
| 3.6     | 5.26E-04 | 6.26E-06       | 0.18483  | 0.0057         | 4.72739  | 0.01309        | 0.20839       | 0.03005        |
| 3.8     | 4.99E-04 | 6.50E-06       | 0.17321  | 0.00626        | 4.61443  | 0.01355        | 0.23358       | 0.03253        |
| 4.1     | 4.66E-04 | 7.39E-06       | 0.1589   | 0.00764        | 4.45632  | 0.01524        | 0.27151       | 0.03884        |
| 4.4     | 4.36E-04 | 6.36E-06       | 0.14536  | 0.00704        | 4.30407  | 0.01292        | 0.31444       | 0.03493        |
| 4.7     | 4.02E-04 | 7.43E-06       | 0.13329  | 0.00885        | 4.11721  | 0.01477        | 0.33492       | 0.04304        |
| 5       | 3.77E-04 | 4.76E-06       | 0.12562  | 0.00599        | 3.97539  | 0.00922        | 0.36535       | 0.02857        |
| 5.3     | 3.50E-04 | 4.49E-06       | 0.12291  | 0.00591        | 3.82893  | 0.00839        | 0.37519       | 0.02798        |
| 5.6     | 3.25E-04 | 3.62E-06       | 0.11356  | 0.00506        | 3.66374  | 0.00652        | 0.39731       | 0.02342        |
| 5.9     | 3.01E-04 | 3.58E-06       | 0.10862  | 0.00525        | 3.51396  | 0.00618        | 0.40771       | 0.02404        |
| 6.2     | 2.80E-04 | 3.52E-06       | 0.10453  | 0.00539        | 3.37558  | 0.00579        | 0.42202       | 0.02439        |
| 6.5     | 2.59E-04 | 3.43E-06       | 0.10098  | 0.00548        | 3.24155  | 0.00537        | 0.43019       | 0.02459        |
| 7       | 2.26E-04 | 3.37E-06       | 0.09847  | 0.00573        | 3.03984  | 0.00482        | 0.42801       | 0.02587        |
| 7.5     | 1.99E-04 | 3.33E-06       | 0.0925   | 0.00601        | 2.8546   | 0.0043         | 0.44712       | 0.02704        |
| 8       | 1.72E-04 | 2.92E-06       | 0.09317  | 0.00552        | 2.6925   | 0.00337        | 0.43766       | 0.02558        |
| 8.5     | 1.50E-04 | 3.05E-06       | 0.08902  | 0.00607        | 2.54465  | 0.00313        | 0.45425       | 0.02863        |
| 9       | 1.27E-04 | 2.85E-06       | 0.08925  | 0.00594        | 2.41131  | 0.00256        | 0.45049       | 0.02952        |
| 9.5     | 1.07E-04 | 2.67E-06       | 0.08728  | 0.00584        | 2.29006  | 0.00208        | 0.45407       | 0.03089        |
| 10      | 8.96E-05 | 2.96E-06       | 0.08645  | 0.00676        | 2.18129  | 0.00195        | 0.46364       | 0.03854        |
| 10.5    | 7.20E-05 | 3.02E-06       | 0.09055  | 0.00722        | 2.08315  | 0.00167        | 0.45154       | 0.04659        |
| 11      | 5.63E-05 | 3.49E-06       | 0.09789  | 0.00879        | 1.99411  | 0.00161        | 0.42403       | 0.06661        |
| 11.5    | 4.08E-05 | 3.37E-06       | 0.10943  | 0.00907        | 1.91149  | 0.0013         | 0.33733       | 0.08937        |

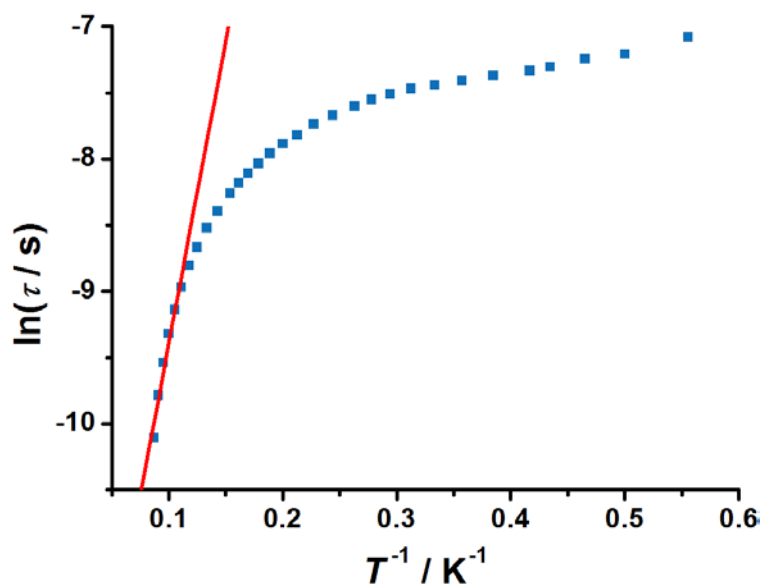

Fig. S13 The plots of  $\ln(\tau)$  vs.  $T^{-1}$  for **2** under 2400 Oe dc fields. The red line represents fit the data in the high temperature region with an Arrhenius law, resulting in an energy barrier  $U_{\text{eff}} = 32$  (3) K, pre-exponential factor  $\tau_0 = 8.4 \times 10^{-7}$  s.

## Computational details

Mononuclear complex **1** has two different structures indicated as **Dy1** and **Dy2** (see Fig. S14). Likewise, complex **2** also has two different structures indicated as **Tb1** and **Tb2**. Thus, the **Dy1** and **Dy2** for **1** and the **Tb1** and **Tb2** for **2** were calculated, respectively. Complete-active-space self-consistent field (CASSCF) calculations on the complete structures of **Dy1**, **Dy2**, **Tb1** and **Tb2** extracted from the compounds on the basis of single-crystal X-ray determined geometry have been carried out with MOLCAS 8.2<sup>7-9</sup> program package.

The basis sets for all atoms are atomic natural orbitals from the MOLCAS ANO-RCC library: ANO-RCC-VTZP for Dy<sup>III</sup> or Tb<sup>III</sup> ion; VTZ for close O; VDZ for distant atoms. The calculations employed the second order Douglas-Kroll-Hess Hamiltonian, where scalar relativistic contractions were taken into account in the basis set and the spin-orbit couplings were handled separately in the restricted active space state interaction (RASSI-SO) procedure. Active electrons in 7 active spaces include all *f* electrons (CAS(9 in 7) for **Dy1** and **Dy2**, and CAS(8 in 7) for **Tb1** and **Tb2**) in the CASSCF calculation. To exclude all the doubts, we calculated all the roots in the active space. We have mixed the maximum number of spin-free state which was possible with our hardware (all from 21 sextets, 128 from 224 quadruplets, 130 from 490 doublets for **Dy1** and **Dy2**; all from 7 septets, all from 140 quintets and 68

from 500 triplets for **Tb1** and **Tb2**). Single-Aniso<sup>10-12</sup> program was used to obtain energy levels, **g** tensors,  $m_J$  values, magnetic axes, *et al.*, based on the above CASSCF/RASSI calculations.

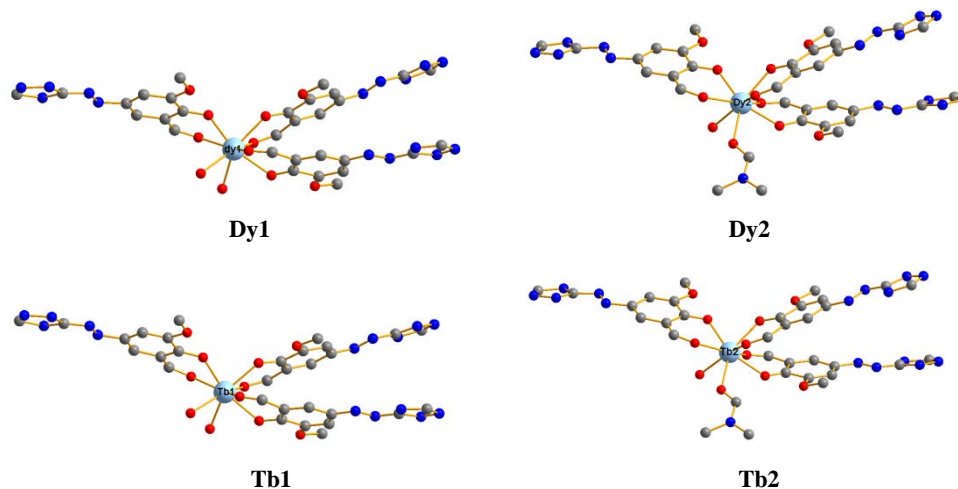

**Fig. S14.** Calculated structures of **Dy1**, **Dy2**, **Tb1** and **Tb2**; H atoms are omitted.

**Table S7.** Calculated energy levels ( $\text{cm}^{-1}$ ), **g** ( $g_x, g_y, g_z$ ) tensors and  $m_J$  values of the lowest eight or seven spin-orbit states of **Dy1**, **Dy2**, **Tb1** and **Tb2** using CASSCF/RASSI with MOLCAS 8.2.

|   | <b>Dy1</b>         |                          |            | <b>Dy2</b>         |                          |            |
|---|--------------------|--------------------------|------------|--------------------|--------------------------|------------|
|   | $E/\text{cm}^{-1}$ | <b>g</b>                 | $m_J$      | $E/\text{cm}^{-1}$ | <b>g</b>                 | $m_J$      |
| 1 | 0.0                | 0.003<br>0.004<br>19.700 | $\pm 15/2$ | 0.0                | 0.001<br>0.001<br>19.619 | $\pm 15/2$ |
| 2 | 169.3              | 0.038<br>0.078<br>16.975 | $\pm 13/2$ | 174.4              | 0.037<br>0.041<br>16.762 | $\pm 13/2$ |
| 3 | 248.3              | 2.549<br>3.151<br>15.487 | $\pm 1/2$  | 301.4              | 0.815<br>1.355<br>12.941 | $\pm 11/2$ |
| 4 | 281.8              | 9.072<br>6.510<br>0.275  | $\pm 9/2$  | 348.0              | 1.714<br>4.130<br>13.517 | $\pm 7/2$  |
| 5 | 342.0              | 2.902<br>4.681<br>10.056 | $\pm 5/2$  | 388.2              | 7.898<br>6.426<br>1.573  | $\pm 5/2$  |
| 6 | 364.7              | 0.754<br>2.169<br>16.691 | $\pm 7/2$  | 415.4              | 1.514<br>3.637<br>13.217 | $\pm 3/2$  |
| 7 | 421.8              | 0.174<br>0.251<br>17.565 | $\pm 3/2$  | 477.7              | 0.314<br>0.656<br>18.631 | $\pm 1/2$  |
| 8 | 535.2              | 0.003<br>0.019           | $\pm 11/2$ | 611.5              | 0.010<br>0.015           | $\pm 9/2$  |

|   |                    |                 |         |                    |                 |         |
|---|--------------------|-----------------|---------|--------------------|-----------------|---------|
|   |                    | 18.959          |         |                    | 19.637          |         |
|   | <b>Tb1</b>         |                 |         | <b>Tb2</b>         |                 |         |
|   | $E/\text{cm}^{-1}$ | $g$             | $m_J$   | $E/\text{cm}^{-1}$ | $g$             | $m_J$   |
| 1 | 0.0                | 0.000           | $\pm 6$ | 0.0                | 0.000           | $\pm 6$ |
|   | 0.07               | 0.000<br>17.769 |         | 0.13               | 0.000<br>17.626 |         |
| 2 | 161.8              | 0.000           | $\pm 5$ | 102.9              | 0.000           | $\pm 5$ |
|   | 162.1              | 0.000<br>14.778 |         | 103.6              | 0.000<br>15.607 |         |
| 3 | 210.9              | 0.000           | $\pm 3$ | 148.6              | 0.000           | $\pm 4$ |
|   | 212.7              | 0.000<br>15.494 |         | 153.3              | 0.000<br>11.990 |         |
| 4 | 293.1              | 0.000           | $\pm 4$ | 224.9              | 0.000           | $\pm 3$ |
|   | 301.3              | 0.000<br>9.377  |         | 253.3              | 0.000<br>8.202  |         |
| 5 | 371.3              | 0.000           | $\pm 1$ | 290.5              |                 | 0       |
|   | 390.4              | 0.000<br>5.787  |         |                    |                 |         |
| 6 | 422.5              |                 | 0       | 362.9              | 0.000           | $\pm 1$ |
|   |                    |                 |         | 372.6              | 0.000<br>13.425 |         |
| 7 | 521.2              | 0.000           | $\pm 2$ | 532.8              | 0.000           | $\pm 2$ |
|   | 525.1              | 0.000<br>16.662 |         | 534.0              | 0.000<br>17.078 |         |

**Table S8.** Wave functions with definite projection of the total moment  $|m_J\rangle$  for the lowest two Kramers doublets (KDs) of **Dy1**, **Dy2**, **Tb1** and **Tb2** using CASSCF/RASSI with MOLCAS 8.2.

|            | $E/\text{cm}^{-1}$ | wave functions                                                                        |
|------------|--------------------|---------------------------------------------------------------------------------------|
| <b>Dy1</b> | 0.0                | 97% $ \pm 15/2\rangle$                                                                |
|            | 169.3              | 80% $ \pm 13/2\rangle$ + 10% $ \pm 11/2\rangle$                                       |
| <b>Dy2</b> | 0.0                | 96% $ \pm 15/2\rangle$                                                                |
|            | 174.4              | 89% $ \pm 13/2\rangle$                                                                |
| <b>Tb1</b> | 0.00               | 98% $ \pm 6\rangle$                                                                   |
|            | 0.07               |                                                                                       |
|            | 161.8              | 88% $ \pm 5\rangle$ + 10% $ \pm 3\rangle$                                             |
|            | 162.1              |                                                                                       |
| <b>Tb2</b> | 0.00               | 96% $ \pm 6\rangle$                                                                   |
|            | 0.13               |                                                                                       |
|            | 102.9              | 28% $ \pm 6\rangle$ + 31% $ \pm 5\rangle$ + 17% $ \pm 3\rangle$ + 10% $ \pm 2\rangle$ |
|            | 103.6              |                                                                                       |

To fit the exchange interactions between **Dy1** and **Dy2** in **1** (**Tb1** and **Tb2** in **2**), we took two steps to obtain them. Firstly, we calculated **Dy1**, **Dy2**, **Tb1** and **Tb2** using CASSCF to obtain the corresponding magnetic properties. Then, the exchange interaction between the magnetic centers is considered within the Lines model,<sup>13</sup> while the account of the dipole-dipole magnetic coupling is treated exactly. The Lines model is effective and has been successfully used widely in the research field of *f*-element single-molecule magnets.<sup>14, 15</sup>

For **1** and **2**, there is only one type of *J*.

The exchange Ising Hamiltonian are:

$$\mathbf{H}_{\text{exch}} = -J\mathbf{S}_{\text{Dy1}}\mathbf{S}_{\text{Dy2}} \quad (\text{S1})$$

$$\mathbf{H}_{\text{exch}} = -J\mathbf{S}_{\text{Tb1}}\mathbf{S}_{\text{Tb2}} \quad (\text{S2})$$

The *J* is the parameter of the total magnetic interaction ( $J_{\text{total}} = J_{\text{dipolar}} + J_{\text{exchange}}$ ) between magnetic center ions. The  $S_{\text{Dy}} = \pm 1/2$  and  $S_{\text{Tb}} = \pm 1/2$  are the ground pseudospin on Dy<sup>III</sup> and Tb<sup>III</sup> sites. The dipolar magnetic coupling can be calculated exactly, while the exchange coupling constants were fitted through comparison of the computed and measured magnetic susceptibilities using the Poly\_Aniso program.<sup>10-12</sup>

**Table S9.** Exchange energies (cm<sup>-1</sup>) and main values of the *g<sub>z</sub>* for the lowest two exchange doublets of **1** and **2**.

|   | <b>1</b>                   |                      | <b>2</b>                   |                      |
|---|----------------------------|----------------------|----------------------------|----------------------|
|   | <i>E</i> /cm <sup>-1</sup> | <i>g<sub>z</sub></i> | <i>E</i> /cm <sup>-1</sup> | <i>g<sub>z</sub></i> |
| 1 | 0.0                        | 2.802                | 0.0                        | 4.115                |
| 2 | 0.1                        | 39.219               | 0.2                        | 30.207               |

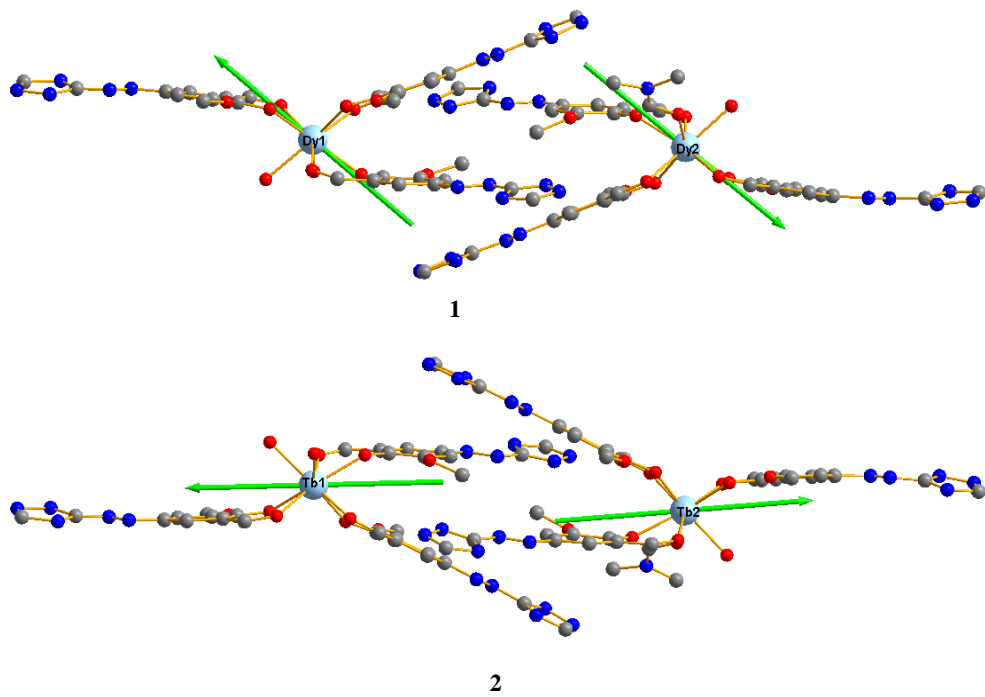

**Fig. S15.** Calculated orientations of the local main magnetic axes in the ground spin-orbit state on Dy<sup>III</sup> ions of **1** and Tb<sup>III</sup> ions of **2**.

## References

1. L.-F. Wang, J.-Z. Qiu, J.-Y. Hong, Y.-C. Chen, Q.-W. Li, J.-H. Jia, J. Jover, E. Ruiz, J.-L. Liu and M.-L. Tong, *Inorg. Chem.*, 2017, **56**, 8829-8836.
2. S.-S. Liu, K. Lang, Y. Zhang, Q. Yang, B.-W. Wang and S. Gao, *Dalton Trans.*, 2016, DOI: 10.1039/C6DT01089J.
3. S. D. Jiang, B. W. Wang, G. Su, Z. M. Wang and S. Gao, *Angew. Chem. Inter. Ed.*, 2010, **49**, 7448-7451.
4. E. Moreno Pineda, N. F. Chilton, R. Marx, M. Dörfel, D. O. Sells, P. Neugebauer, S.-D. Jiang, D. Collison, J. van Slageren, E. J. L. McInnes and R. E. P. Winpenny, *Nat. Commun.*, 2014, **5**, 5243.
5. N. Ishikawa, M. Sugita, T. Ishikawa, S.-y. Koshihara and Y. Kaizu, *J. Am. Chem. Soc.*, 2003, **125**, 8694-8695.
6. L.-Q. Huang, Y.-Y. Lin, J.-D. Leng, J. Wang, L.-F. Yang and W. Dong, *Inorg. Chim. Acta*, 2018, **469**, 38-43.
7. F. Aquilante, L. De Vico, N. Ferré, G. Ghigo, P.-å. Malmqvist, P. Neogrády, T. B. Pedersen, M. Pitoňák, M. Reiher, B. O. Roos, L. Serrano-Andrés, M. Urban, V. Veryazov and R. Lindh, *J. Comput. Chem.*, 2010, **31**, 224-247.
8. V. Veryazov, P.-O. Widmark, L. Serrano-Andrés, R. Lindh and B. O. Roos, *Int. J. Quantum Chem*, 2004, **100**, 626-635.
9. G. Karlström, R. Lindh, P.-Å. Malmqvist, B. O. Roos, U. Ryde, V. Veryazov, P.-O. Widmark, M. Cossi, B. Schimmelpfennig, P. Neogrady and L. Seijo, *Comput. Mater. Sci.*, 2003, **28**, 222-239.
10. L. F. Chibotaru, L. Ungur and A. Soncini, *Angew. Chem. Int. Ed.*, 2008, **47**, 4126-4129.
11. L. Ungur, W. Van den Heuvel and L. F. Chibotaru, *New J. Chem.*, 2009, **33**, 1224-1230.
12. L. F. Chibotaru, L. Ungur, C. Aronica, H. Elmoll, G. Pilet and D. Luneau, *J. Am. Chem. Soc.*, 2008, **130**, 12445-12455.
13. M. E. Lines, *The Journal of Chemical Physics*, 1971, **55**, 2977-2984.
14. K. C. Mondal, A. Sundt, Y. Lan, G. E. Kostakis, O. Waldmann, L. Ungur, L. F. Chibotaru, C. E. Anson and A. K. Powell, *Angew. Chem. Int. Ed.*, 2012, **51**, 7550-7554.
15. S. K. Langley, D. P. Wielechowski, V. Vieru, N. F. Chilton, B. Moubaraki, B. F. Abrahams, L. F. Chibotaru and K. S. Murray, *Angew. Chem. Int. Ed.*, 2013, **52**, 12014-12019.
